# Supplementary material
Source: MDPI journal article supplement (https://www.mdpi.com/2076-3417/11/13/5801)
Supplement: s1 [file s1]

# Supplementary material

**Table S1.** Honey samples of diverse botanical, geographical origin and harvest date. Number of bacterial isolates per honey sample and per culture medium.

| Sample No | Botanical source             | Geographical location | Harvest date   | PCA | LB | BCM | MRS | Total isolates/sample |
|-----------|------------------------------|-----------------------|----------------|-----|----|-----|-----|-----------------------|
| 1         | Multifloral                  | Mount Olympus         | 2016           | 44  | 49 | 33  | 1   | 127                   |
| 2         | Arbutus                      | Mount Athos           | 2018           | 30  | 19 | 28  | -   | 77                    |
| 3         | Heather (Erica)              | Mount Athos           | 2018           | 13  | 93 | 12  | -   | 118                   |
| 4         | Chestnut (Castanea)          | Mount Athos           | 2018           | 28  | 61 | 18  | 5   | 112                   |
| 5         | Multifloral                  | Mount Olympus         | 2016           | 18  | 54 | 18  | -   | 90                    |
| 6         | Polyfloral & Conifers        | Azoros, Mount Olympus | 2014           | 12  | 47 | 11  | -   | 70                    |
| 7         | Oak (Quercus)                | Mount Pilio           | 2010           | 24  | 86 | 6   | 1   | 117                   |
| 8         | Arbutus                      | Mount Pilio           | - <sup>1</sup> | 13  | 43 | 6   | -   | 62                    |
| 9         | Multifloral                  | Mount Olympus         | 2017           | 27  | 33 | 21  | -   | 81                    |
| 10        | Fir & Thyme (Abies & Thymus) | Mount Giona, Delphi   | -              | 24  | 30 | 29  | -   | 83                    |
| 11        | Fir (Abies)                  | Mount Giona, Delphi   | -              | 12  | 27 | 17  | -   | 56                    |
| 12        | Fir (Abies)                  | Mount Giona, Delphi   | -              | 28  | 10 | 3   | -   | 41                    |
| 13        | Thyme (Thymus)               | Mount Giona, Delphi   | -              | 43  | 39 | 30  | -   | 112                   |
| 14        | Fennel (Foeniculum)          | Evia Island           | 2018           | 144 | 32 | 9   | 5   | 190                   |
| 15        | Fir (Abies)                  | Argolida              | 2019           | 4   | 10 | 5   | -   | 19                    |
| 16        | Thyme (Thymus)               | Tinos Island          | 2019           | 11  | 19 | 0   | -   | 30                    |
| 17        | Thyme (Thymus)               | Andros Island         | 2019           | 15  | 12 | 0   | -   | 27                    |
| 18        | Thyme (Thymus)               | Andros Island         | 2019           | 14  | 11 | 5   | 8   | 38                    |
| 19        | Thyme (Thymus)               | Sikinos Island        | 2019           | 3   | 4  | 0   | -   | 7                     |
| 20        | Thyme (Thymus)               | Ios Island            | 2019           | 10  | 10 | 0   | -   | 20                    |
| 21        | Pine (Pinus)                 | Korinthia             | 2019           | 4   | 14 | 5   | 15  | 38                    |
| 22        | Fir (Abies)                  | Argolida              | 2019           | 15  | 9  | 0   | -   | 24                    |
| 23        | Fir (Abies) & Multifloral    | Argolida              | 2019           | 1   | 0  | 0   | 8   | 9                     |
| 24        | Fir (Abies)                  | Argolida              | 2019           | 25  | 11 | 0   | -   | 36                    |
| 25        | Fir (Abies)                  | Argolida              | 2019           | 1   | 14 | 0   | 7   | 22                    |
| 26        | Pine (Pinus)                 | Korinthia             | 2019           | 22  | 18 | 0   | -   | 40                    |
| 27        | Fir (Abies)                  | Argolida              | 2019           | 15  | 15 | 13  | -   | 43                    |
| 28        | Fir (Abies) & Multifloral    | Korinthia             | 2019           | 18  | 10 | 0   | -   | 28                    |
| 29        | Thyme (Thymus)               | Korinthia             | 2019           | 22  | 18 | 17  | -   | 57                    |
| 30        | Thyme (Thymus)               | Attica                | 2019           | 23  | 19 | 0   | -   | 42                    |
| 31        | Thyme (Thymus)               | Attica                | 2019           | 15  | 14 | 0   | -   | 29                    |
| 32        | Pine (Pinus)                 | Evia Island           | 2019           | 3   | 11 | 7   | 13  | 34                    |
| 33        | Heather (Erica)              | Andros Island         | 2019           | 14  | 9  | 11  | 3   | 37                    |
| 34        | Thyme (Thymus)               | Serifos Island        | 2019           | -   | -  | 1   | -   | 1                     |
| 35        | Pine (Pinus)                 | Evia Island           | 2019           | -   | -  | 6   | 4   | 10                    |
| 36        | Cotton (Gossypium)           | Karditsa              | 2019           | -   | -  | 13  | 4   | 17                    |
| 37        | Pine (Pinus)                 | Evia Island           | 2019           | -   | -  | 0   | 1   | 1                     |
| 38        | Thyme (Thymus)               | Chios Island          | 2019           | -   | -  | 1   | 1   | 2                     |
| 39        | Heather (Erica)              | Andros Island         | 2019           | -   | -  | 2   | 2   | 4                     |
| 40        | Thyme (Thymus)               | Naxos Island          | 2019           | -   | -  | -   | 2   | 2                     |
| 41        | Cotton (Gossypium)           | Larissa               | 2019           | -   | -  | 13  | 4   | 17                    |
| 42        | Thyme (Thymus)               | Ios Island            | 2019           | -   | -  | 0   | -   | 0                     |
| 43        | Pine (Pinus)                 | Rhodos Island         | 2019           | -   | -  | 27  | 0   | 27                    |

|                                  |                |               |      |     |     |     |    |      |
|----------------------------------|----------------|---------------|------|-----|-----|-----|----|------|
| 44                               | Thyme (Thymus) | Lakonia       | 2019 | -   | -   | 1   | -  | 1    |
| 45                               | Thyme (Thymus) | Lesbos Island | 2019 | -   | -   | 0   | 14 | 14   |
| 46                               | Multifloral    | Rhodos Island | 2019 | -   | -   | 2   | -  | 2    |
| Total isolates per culture media |                |               |      | 695 | 851 | 370 | 98 | 2014 |

<sup>1</sup> Unknown harvest date, Not cultured on this culture medium.

**Table S2.** Grouping of bacterial isolates by RFLP assay and Gram staining

| Group | Gram            | Isolates |
|-------|-----------------|----------|
| A     | +               | 176      |
| B     | +               | 27       |
| C     | +               | 49       |
| F     | +               | 13       |
| G     | +               | 6        |
| I     | +               | 3        |
| J     | +               | 1        |
| K     | +               | 1        |
| L     | +               | 1        |
| M     | +               | 2        |
| O     | +               | 4        |
| T     | +               | 1        |
| Y     | +               | 1        |
| W     | +               | 1        |
| H     | -               | 6        |
| S     | -               | 1        |
| LAB1  | ND <sup>1</sup> | 20       |
| LAB2  | ND              | 2        |
| LAB3  | ND              | 1        |

<sup>1</sup>ND not determined.
